# Supplementary material for: A green process for coupling manganese oxides with titanium(iv) dioxide
Source: Royal Society of Chemistry journal article supplement (doi:10.1039/b803989e), 2008-01-01
Supplement: b803989e.pdf [file b803989e.pdf]

**Table S1:** XPS binding energies in electron volts for as-deposited and heated samples.

| Sample                | Ti2p <sub>3/2</sub> | C1s   | Mn2p <sub>3/2</sub> | O1s   |
|-----------------------|---------------------|-------|---------------------|-------|
| as-deposited          | 458.8               | 284.7 | 642.3               | 530.0 |
| heated <sup>[a]</sup> | 458.8               | 285.1 | 642.5               | 530.1 |

[a] heated at 873 K for 2 h

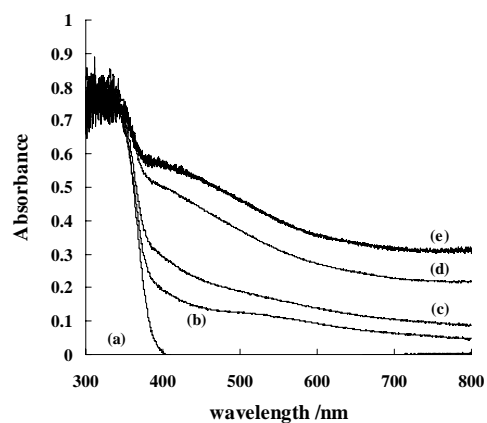

**Figure S1.** Electronic absorption spectra of  $\beta$ -MnO<sub>2</sub>(n)/TiO<sub>2</sub>: (a)  $n = 0$ ; (b)  $n = 1$ ; (c)  $n = 2$ ; (d)  $n = 3$ ; (e)  $n = 5$ .

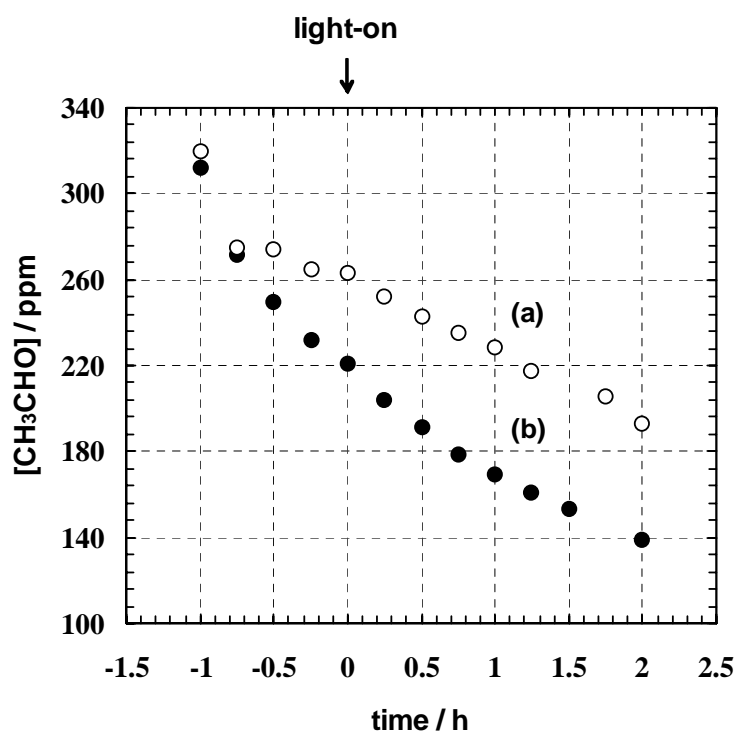

**Figure S2.** Time courses for the CH<sub>3</sub>CHO decomposition in the dark and under irradiation: (a) TiO<sub>2</sub>, (b)  $\beta$ -MnO<sub>2</sub>/TiO<sub>2</sub>.
